# Supplementary material for: Costs and effects of a state-wide health promotion program in primary schools in Germany – the Baden-Württemberg Study: A cluster-randomized, controlled trial
Source: PubMed Central journal article supplement (PMC5319648; doi:10.1371/journal.pone.0172332), 2017-02-21
Supplement: pone.0172332.s003.pdf [file pone.0172332.s003.pdf]

## Cost-effectiveness of the statewide health promotion program "Join the Healthy Boat" in primary schools

### S1: Detailed overview of all costs.

| Category                                                                 | Quantity |
|--------------------------------------------------------------------------|----------|
| Number of participating consulting teachers in the school year 2010/2011 | 32       |
| Number of participating teachers in the school year 2010/2011            | 439      |
| Numbers of participating teachers in evaluation schools 2010/2011        | 81       |

Consulting teachers (n=32) trained 439 teachers in total in the school year 2010/2011, of which 81 were participating in the evaluation.

The total costs were calculated by multiplying the quantity and the unit costs for each item. As the costs for the delivery of the intervention in a routinely manner were documented within the present study, the total costs were multiplied with the factor  $81/439$ , because 81 teachers out of 439 teachers participated in the evaluation. For the calculation of the costs per child, the entire number of pupils in the intervention classes (n=1458) was used, assuming that all children benefited from the intervention, independent of their study participation.

*Note.* Numbers are rounded, meaning that differences in sums are due to those rounding differences.

| Category                                     | Quantity | Unit costs | Total costs | Weighted<br>(*81/439) | Comments                                       |
|----------------------------------------------|----------|------------|-------------|-----------------------|------------------------------------------------|
| <b>Seminars</b>                              |          |            |             |                       |                                                |
| <b>Seminar 1</b>                             |          |            |             |                       |                                                |
| <b>Organisation</b>                          |          |            |             |                       |                                                |
| Rent of seminar rooms                        | 1        | 372.80     | 372.80      | 68.79                 |                                                |
| Subsistence costs                            | 1        | 571.80     | 571.80      | 105.50                | Subsistence on the first day                   |
| Subsistence costs                            | 1        | 612.87     | 612.87      | 113.08                | Subsistence on the second day                  |
| Travel expenses consulting teachers          | 1        | 2267.27    | 2267.27     | 418.33                | All travel expenses are added up to one amount |
| Hotel costs consulting teachers              | 1        | 1633.50    | 1633.50     | 301.40                | All hotel costs are added up to one amount     |
| <b>Materials</b>                             |          |            |             |                       |                                                |
| Materials printed double sided and in colour | 2400     | 0.12       | 276.00      | 50.92                 | Per consulting teacher: 75 double sided pages  |
| File                                         | 32       | 0.24       | 7.68        | 1.42                  | Per consulting teacher: 1 file                 |
| CDs                                          | 64       | 0.24       | 15.35       | 2.83                  | Per consulting teacher: 2 CDs                  |
| CD-labels                                    | 64       | 0.21       | 13.30       | 2.45                  | Per consulting teacher: 2 CD-labels            |
| CD-cases                                     | 64       | 0.05       | 2.94        | 0.54                  | Per consulting teacher: 2 CD-cases             |
| Transparent envelope                         | 32       | 0.06       | 1.92        | 0.35                  | Per consulting teacher: 1 transparent envelope |
| <b>Seminar 2</b>                             |          |            |             |                       |                                                |
| Personnel costs for guest speaker            | 1        | 260.00     | 260.00      | 47.97                 |                                                |
| <b>Organisation</b>                          |          |            |             |                       |                                                |
| Subsistence costs                            | 1        | 1628.20    | 1628.20     | 300.42                | Subsistence for two days                       |
| Travel expenses consulting teachers          | 1        | 1292.85    | 1292.85     | 238.54                | All travel expenses are added up to one amount |
| Hotel costs consulting teachers              | 1        | 1080.00    | 1080.00     | 199.27                | All hotel costs are added up to one amount     |

| Category                                                                         | Quantity | Unit costs | Total costs | Weighted<br>(*81/439) | Comments                                                                                                      |
|----------------------------------------------------------------------------------|----------|------------|-------------|-----------------------|---------------------------------------------------------------------------------------------------------------|
| <b>Materials</b>                                                                 |          |            |             |                       |                                                                                                               |
| Printed pages, files, CDs, CD-labels, CD-cases, transparent envelopes            | 1        | 317.18     | 317.18      | 58.52                 | Exact the same items and costs as for seminar 1                                                               |
| <b>Both seminars</b>                                                             |          |            |             |                       |                                                                                                               |
| <b>Materials</b>                                                                 |          |            |             |                       |                                                                                                               |
| Letters of invitation for seminars and salary bills                              | 128      | 0.05       | 6.40        | 1.18                  | Per consulting teacher: 2 invitations and 2 bills                                                             |
| Christmas card for consulting teachers                                           | 32       | 1.00       | 32.00       | 5.90                  | Per consulting teacher: 1 card                                                                                |
| Envelopes                                                                        | 160      | 0.04       | 6.08        | 1.12                  | Per consulting teacher: 5 envelopes                                                                           |
| Postal charges                                                                   | 160      | 0.55       | 88.00       | 16.24                 | Per consulting teacher: 5x postal charges                                                                     |
| Distributed folders including all intervention materials for consulting teachers | 32       | 38.90      | 1244.80     | 229.68                | Per consulting teacher: 1 folder                                                                              |
| <b>Vocational training sessions</b>                                              |          |            |             |                       |                                                                                                               |
| Travel expenses consulting teachers                                              | /        |            |             |                       | Travel expenses are payed by the "Landesinstitut für Schulsport, Schulkunst und Schulmusik Baden-Württemberg" |
| Travel expenses participating teachers                                           | /        |            |             |                       | Travel expenses are payed by the "Landesinstitut für Schulsport, Schulkunst und Schulmusik Baden-Württemberg" |
| <b>Vocational training 1</b>                                                     |          |            |             |                       |                                                                                                               |
| <b>Materials</b>                                                                 |          |            |             |                       |                                                                                                               |
| Materials printed double sided and in colour for consulting teachers             | 1024     | 0.12       | 117.76      | 21.73                 | Per consulting teacher: 32 double sided pages                                                                 |
| Materials printed double sided and in colour for teachers                        | 3512     | 0.12       | 403.88      | 74.52                 | Per teacher: 8 double sided pages                                                                             |

| Category                                                                                                              | Quantity | Unit costs | Total costs | Weighted<br>(*81/439) | Comments                                        |
|-----------------------------------------------------------------------------------------------------------------------|----------|------------|-------------|-----------------------|-------------------------------------------------|
| CDs                                                                                                                   | 64       | 0.24       | 15.35       | 2.83                  | Per consulting teacher: 2 CDs                   |
| CD-labels                                                                                                             | 64       | 0.21       | 13.30       | 2.45                  | Per consulting teacher: 2 CD-labels             |
| CD-cases                                                                                                              | 64       | 0.05       | 2.94        | 0.54                  | Per consulting teacher: 2 CD-cases              |
| Separator sheet                                                                                                       | 32       | 0.03       | 0.90        | 0.17                  | Per consulting teacher: 1 separator sheet       |
| "Pirate game" printed A1                                                                                              | 32       | 7.19       | 230.08      | 42.45                 | Per consulting teacher: 1 printed "pirate game" |
| <b>Vocational training 2</b>                                                                                          |          |            |             |                       |                                                 |
| <b>Materials</b>                                                                                                      |          |            |             |                       |                                                 |
| Materials printed double sided and in colour for consulting teachers                                                  | 672      | 0.12       | 77.28       | 14.26                 | Per consulting teacher: 21 double sided pages   |
| Materials printed double sided and in colour for teachers                                                             | 1756     | 0.12       | 201.94      | 37.26                 | Per teacher: 4 double sided pages               |
| Separator sheet                                                                                                       | 32       | 0.03       | 0.90        | 0.17                  | Per consulting teacher: 1 separator sheet       |
| <b>Vocational training 3</b>                                                                                          |          |            |             |                       |                                                 |
| <b>Materials</b>                                                                                                      |          |            |             |                       |                                                 |
| Materials printed double sided and in colour for consulting teachers                                                  | 896      | 0.12       | 103.04      | 19.01                 | Per consulting teacher: 28 double sided pages   |
| Materials printed double sided and in colour for teachers                                                             | 5707     | 0.12       | 656.31      | 121.10                | Per teacher: 13 double sided pages              |
| Separator sheet                                                                                                       | 32       | 0.03       | 0.90        | 0.17                  | Per consulting teacher: 1 separator sheet       |
| <b>All three vocational training sessions</b>                                                                         |          |            |             |                       |                                                 |
| <b>Organisation</b>                                                                                                   |          |            |             |                       |                                                 |
| Subsistence flat charge for consulting teachers for subsistence of teachers at all three vocational training sessions | 32       | 200.00     | 6400.00     | 1180.87               |                                                 |

| Category                                                                                                    | Quantity | Unit costs | Total costs | Weighted<br>(*81/439) | Comments                                                                                                                                                                  |
|-------------------------------------------------------------------------------------------------------------|----------|------------|-------------|-----------------------|---------------------------------------------------------------------------------------------------------------------------------------------------------------------------|
| <b>Materials</b>                                                                                            |          |            |             |                       |                                                                                                                                                                           |
| Shipping envelopes for consulting teachers for vocational training session materials (70% of the materials) | 66       | 0.24       | 15.84       | 2.92                  | 70% of the vocational training session materials are send as "Maxibrief" ( $\cong$ 22 envelopes); 3 envelopes per consulting teacher, one per vocational training session |
| Postal charges for shipping envelopes for consulting teachers (70% of the materials)                        | 66       | 2.20       | 145.20      | 26.79                 | 70% of the vocational training session materials are send as "Maxibrief" ( $\cong$ 22 envelopes); 3x postal charges per consulting teacher                                |
| Postal charges packet for consulting teachers (30% of the materials)                                        | 30       | 3.75       | 112.50      | 20.76                 | 30% of the vocational training session materials are send as packet ( $\cong$ 10 packets); 3x postal charges per consulting teacher, one per vocational training session  |
| Shipping envelope for consulting teachers for sending back the process evaluation questionnaires            | 32       | 0.24       | 7.68        | 1.42                  | Per consulting teacher: 1 shipping envelope                                                                                                                               |
| Postal charges of post-paid shipping envelopes for consulting teachers                                      | 32       | 2.20       | 70.40       | 12.99                 | Per consulting teacher: 1x postal charges                                                                                                                                 |
| Envelopes for teachers for sending back the process evaluation questionnaires                               | 439      | 0.04       | 16.67       | 3.08                  | Per teacher: 1 envelope                                                                                                                                                   |
| Postal charges of post-paid envelopes                                                                       | 439      | 0.55       | 241.45      | 44.55                 | Per teacher: 1x postal charges                                                                                                                                            |
| Distributed folders for teachers                                                                            | 439      | 38.90      | 17077.10    | 3150.90               | Per teacher: 1 folder                                                                                                                                                     |
| <b>Public relations</b>                                                                                     |          |            |             |                       |                                                                                                                                                                           |
| "Boots-Tour" travel expenses participating teachers                                                         | 1        | 973.20     | 973.20      | 179.57                | 46 teachers participated; costs are added up to one amount                                                                                                                |

| Category                                                               | Quantity                  | Unit costs | Total costs | Weighted<br>(*81/439) | Comments                                                                                                                                             |
|------------------------------------------------------------------------|---------------------------|------------|-------------|-----------------------|------------------------------------------------------------------------------------------------------------------------------------------------------|
| "Boots-Tour" subsistence costs                                         | 1                         | 204.97     | 204.97      | 37.82                 | Subsistence costs for consulting teachers; only 8 submitted their costs to receive the monetary reward                                               |
| "Boots-Tour" travel expenses research assistants                       | 2494                      | 0.25       | 623.50      | 115.04                | Distance in km from Ulm to the ten locations of the Boots-Tour of 2011; amount per km: 0.25€                                                         |
| Cover letter                                                           | 0.5                       | 543.83     | 271.92      | 50.17                 | The assessed costs hold for two years, indicating that only half of the costs are counted                                                            |
| Envelopes C5                                                           | 0.5                       | 240.40     | 120.20      | 22.18                 | See above                                                                                                                                            |
| Inlay sheet                                                            | 0.5                       | 460.77     | 230.38      | 42.51                 | See above                                                                                                                                            |
| Flyer                                                                  | 0.5                       | 1423.28    | 711.64      | 131.30                | See above                                                                                                                                            |
| Poster A3                                                              | 0.5                       | 462.97     | 231.48      | 42.71                 | See above                                                                                                                                            |
| Layout poster and flyers                                               | 0.5                       | 1492.26    | 746.13      | 137.67                | See above                                                                                                                                            |
| Advertisement                                                          | 1                         | 1800.00    | 1800.00     | 332.12                |                                                                                                                                                      |
| <b>Personnel costs</b>                                                 |                           |            |             |                       |                                                                                                                                                      |
| Salary of consulting teachers                                          | 29                        | 1200.00    | 34800.00    | 6420.96               | Only 30 salary strokes for 32 consulting teachers: two consulting teachers are sharing the work with someone else, therefore they share their salary |
| Salary of consulting teachers                                          | 1                         | 700.00     | 700.00      | 129.16                | See above                                                                                                                                            |
| 1 secretary, 50% of total working time (one person; 75% of employment) | 50% of total working time | 40800.00   | 15300.00    | 2823.01               | Salary according to "Personalsätze DFG 2010"                                                                                                         |

| Category                                                                              | Quantity                                                                                   | Unit costs | Total costs | Weighted<br>(*81/439) | Comments                                     |
|---------------------------------------------------------------------------------------|--------------------------------------------------------------------------------------------|------------|-------------|-----------------------|----------------------------------------------|
| 6 research assistants, 50% of total working time (1x75%, 1x100%, 4x50% of employment) | 50% of total working time:<br>1 x 75%<br>1 x 100%<br>4 x 50%<br>(1*37.5%,<br>1*50%, 4*25%) | 55200.00   | 103500.00   | 19096.81              | Salary according to "Personalsätze DFG 2010" |
| <b>Total, €</b>                                                                       |                                                                                            |            |             |                       |                                              |
|                                                                                       |                                                                                            |            | 197855.75   | <b>36506.41</b>       |                                              |
| <b>Per pupil (1458)</b>                                                               |                                                                                            |            |             |                       |                                              |
|                                                                                       |                                                                                            |            | 135.70      | <b>25.04</b>          |                                              |
